# Supplementary material
Source: PubMed Central journal article supplement (PMC2794065)
Supplement: mcp262_1.pdf [file mcp262_1.pdf]

## SUPPLEMENTARY DATA

Trait means for the 234 temperate broadleaved species at four sites in south-western China. Abbreviations: EBF, evergreen broadleaved forest; MF, mixed forest; EB, evergreen broadleaved species; DB, deciduous broadleaved species; TM, twig mass; TLA, total leaf area; TLM, total leaf mass; Emei 1, low altitude site of Emei Mountain; Emei 2, high altitude site of Emei Mountain

| Site   | Forest type | Life form      | Family                                             | Species                                            | TM (mg) | TLA (mm <sup>2</sup> ) | TLM (mg) |
|--------|-------------|----------------|----------------------------------------------------|----------------------------------------------------|---------|------------------------|----------|
| Emei 1 | EBF         | EB             | Aquifoliaceae                                      | <i>Ilex chinensis</i>                              | 815.8   | 8348.5                 | 699.1    |
|        | EBF         | EB             | Aucubaceae                                         | <i>Aucuba chinensis</i>                            | 8298.6  | 52301.6                | 7521.5   |
|        | EBF         | EB             | Celastraceae                                       | <i>Euonymus maximowiczianus</i>                    | 924.2   | 11388.2                | 807.7    |
|        | EBF         | EB             | Chloranthaceae                                     | <i>Sarcandra glabra</i>                            | 461.8   | 8985.6                 | 373.6    |
|        | EBF         | EB             | Cornaceae                                          | <i>Aucuba chinensis</i>                            | 843.3   | 11646.9                | 752.3    |
|        | EBF         | EB             | Ebenaceae                                          | <i>Diospyros cathayensis</i>                       | 38.6    | 942.7                  | 32.9     |
|        | EBF         | EB             | Elacocarpaceae                                     | <i>Sloanea hemsleyana</i>                          | 1054.1  | 12551.8                | 859.8    |
|        | EBF         | EB             | Elaeocarpaceae                                     | <i>Sloanea sinensis</i>                            | 3091.9  | 31642.8                | 2378     |
|        | EBF         | EB             | Elaeocarpaceae                                     | <i>Elaeocarpus japonicus</i> var. <i>japonicus</i> | 2065.3  | 21654                  | 1333     |
|        | EBF         | EB             | Ericaceae                                          | <i>Rhododendron stamineum</i>                      | 658.8   | 5191.6                 | 596.6    |
|        | EBF         | EB             | Ericaceae                                          | <i>Vaccinium moupinense</i>                        | 437.3   | 4978                   | 369.8    |
|        | EBF         | EB             | Euphorbiaceae                                      | <i>Leptopus esquirolii</i>                         | 367.6   | 7143.6                 | 232.3    |
|        | EBF         | EB             | Icacinaceae                                        | <i>Nothapodytes pittosporoides</i>                 | 665.1   | 10825.1                | 584.1    |
|        | EBF         | EB             | Lauraceae                                          | <i>Cinnamomum wilsonii</i>                         | 689.5   | 8290                   | 599.5    |
|        | EBF         | EB             | Lauraceae                                          | <i>Neolitsea confertifolia</i>                     | 319.4   | 4833.7                 | 268.9    |
|        | EBF         | EB             | Lauraceae                                          | <i>Actinodaphne omeiensis</i>                      | 4864.8  | 35143.6                | 3706.8   |
|        | EBF         | EB             | Lauraceae                                          | <i>Cinnamomum tonkinense</i>                       | 2302    | 19702.5                | 1944.7   |
|        | EBF         | EB             | Lauraceae                                          | <i>Lindera megaphylla</i>                          | 3329.9  | 35472.2                | 2620.8   |
|        | EBF         | EB             | Lauraceae                                          | <i>Machilus tenuipila</i>                          | 2120.6  | 15475                  | 1473.3   |
|        | EBF         | EB             | Lauraceae                                          | <i>Litsea ichangensis</i>                          | 1425    | 10045.1                | 1278.5   |
|        | EBF         | EB             | Lauraceae                                          | <i>Phoebe zhenan</i>                               | 404.2   | 5302.6                 | 349.8    |
|        | EBF         | EB             | Lauraceae                                          | <i>Machilus pingii</i>                             | 1111.5  | 11059.7                | 936.2    |
|        | EBF         | EB             | Lauraceae                                          | <i>Machilus ichangensis</i>                        | 807.7   | 8022.7                 | 699      |
|        | EBF         | EB             | Lauraceae                                          | <i>Lindera communis</i>                            | 312.1   | 3520.7                 | 247.1    |
|        | EBF         | EB             | Lauraceae                                          | <i>Phoebe microphylla</i>                          | 924.5   | 14478.7                | 842.2    |
|        | EBF         | EB             | Lauraceae                                          | <i>Cinnamomum longepaniculatum</i>                 | 1976.7  | 22015.7                | 1445.3   |
|        | EBF         | EB             | Lauraceae                                          | <i>Litsea magnoliifolia</i>                        | 1694    | 22168                  | 1598.7   |
|        | EBF         | EB             | Magnoliaceae                                       | <i>Illicium henryi</i>                             | 2567.2  | 26232.3                | 2339.6   |
|        | EBF         | EB             | Magnoliaceae                                       | <i>Michelia martinii</i>                           | 1260.9  | 13664                  | 1097.6   |
|        | EBF         | EB             | Moraceae                                           | <i>Ficus irisana</i>                               | 4533.2  | 60291.5                | 3596.9   |
|        | EBF         | EB             | Myrsinaceae                                        | <i>Myrsine africana</i>                            | 263.7   | 3265.1                 | 220.6    |
| EBF    | EB          | Pittosporaceae | <i>Pittosporum adaphniphylloides</i>               | 1194                                               | 15910.4 | 1083.3                 |          |
| EBF    | EB          | Pittosporaceae | <i>Pittosporum tobira</i>                          | 841.6                                              | 11048.3 | 747.1                  |          |
| EBF    | EB          | Symplocaceae   | <i>Symplocos laurina</i>                           | 3137.4                                             | 41319.9 | 2846.1                 |          |
| EBF    | EB          | Theaceae       | <i>Eurya obtusifolia</i>                           | 455.3                                              | 6968    | 392.3                  |          |
| EBF    | EB          | Theaceae       | <i>Camellia tsaii</i>                              | 225.8                                              | 3669.8  | 191.9                  |          |
| EBF    | EB          | Theaceae       | <i>Elaeocarpus japonicus</i> var. <i>japonicus</i> | 834.5                                              | 19450.9 | 716.1                  |          |
| Emei 2 | EBF         | EB             | Celastraceae                                       | <i>Euonymus acanthocarpus</i>                      | 541.5   | 5946.1                 | 442.5    |
|        | EBF         | EB             | Celastraceae                                       | <i>Euonymus maximowiczianus</i>                    | 454.7   | 4138.9                 | 299.3    |
|        | EBF         | EB             | Celastraceae                                       | <i>Microtropis triflora</i> var. <i>triflora</i>   | 482.8   | 6860.4                 | 430.7    |
|        | EBF         | EB             | Daphniphyllaceae                                   | <i>Daphniphyllum macropodum</i>                    | 4878.2  | 45567.1                | 4198.1   |

|       |     |    |                |                                                  |        |         |        |
|-------|-----|----|----------------|--------------------------------------------------|--------|---------|--------|
|       | EBF | EB | Elaeagnaceae   | <i>Ecuprea Rehd</i>                              | 1095   | 11043.4 | 881.3  |
|       | EBF | EB | Euphorbiaceae  | <i>Leptopus lolonum</i>                          | 176.1  | 4244.1  | 129.9  |
|       | EBF | EB | Fagaceae       | <i>Castanopsis platycantha</i>                   | 1484.9 | 13723.3 | 1190.3 |
|       | EBF | EB | Fagaceae       | <i>Lithocarpus pasania</i>                       | 3028.6 | 24222.7 | 2579.1 |
|       | EBF | EB | Fagaceae       | <i>Cyclobalanopsis gracilis</i>                  | 337.1  | 3582.5  | 273.6  |
|       | EBF | EB | Fagaceae       | <i>Lithocarpus calolepis</i>                     | 1954.1 | 13730.7 | 1646.1 |
|       | EBF | EB | Icacinaceae    | <i>Nothapodytes pittosporoides</i>               | 2376.2 | 24429.4 | 1897.1 |
|       | EBF | EB | Lauraceae      | <i>Litsea elongata</i>                           | 1184.3 | 12484.1 | 1016.6 |
|       | EBF | EB | Lauraceae      | <i>Lindera thomsonii</i>                         | 998.4  | 10873.6 | 828.3  |
|       | EBF | EB | Lauraceae      | <i>Cinnamomum wilsonii</i>                       | 1385.7 | 10925.4 | 1247.5 |
|       | EBF | EB | Lauraceae      | <i>Cinnamomum bodinieri</i>                      | 1847.2 | 19699.2 | 1621.9 |
|       | EBF | EB | Lauraceae      | <i>Actinodaphne lecomtei</i>                     | 1034.8 | 9496.2  | 895.7  |
|       | EBF | EB | Lauraceae      | <i>Machilus pingii</i>                           | 676    | 7210.2  | 581.3  |
|       | EBF | EB | Lauraceae      | <i>Machilus ichangensis</i>                      | 677    | 5172    | 618.7  |
|       | EBF | EB | Lauraceae      | <i>Lindera glauca</i>                            | 643.3  | 6882.5  | 583.6  |
|       | EBF | EB | Lauraceae      | <i>Phoebe zhenan</i>                             | 567.3  | 4944.8  | 495.3  |
|       | EBF | EB | Lauraceae      | <i>Phoebe faberi</i>                             | 821.9  | 9056.3  | 677.9  |
|       | EBF | EB | Magnoliaceae   | <i>Michelia wilsonii</i>                         | 644.8  | 9458.7  | 538.8  |
|       | EBF | EB | Myrsinaceae    | <i>Ardisia crenata</i> var. <i>crenata</i>       | 508.7  | 7503.5  | 377.3  |
|       | EBF | EB | Pittosporaceae | <i>Pittosporum tobira</i>                        | 421.8  | 6467.8  | 346.9  |
|       | EBF | EB | Rosaceae       | <i>Stranvaesia davidiana</i>                     | 860.6  | 10173.1 | 748.2  |
|       | EBF | EB | Symplocaceae   | <i>Symplocos anomala</i>                         | 1041.9 | 10475.2 | 920.6  |
|       | EBF | EB | Symplocaceae   | <i>Symplocos crassilimba</i>                     | 556.4  | 6267.2  | 489.4  |
|       | EBF | EB | Symplocaceae   | <i>Symplocos viridissima</i>                     | 594.9  | 8369.7  | 503.2  |
|       | EBF | EB | Symplocaceae   | <i>Symplocos sumuntia</i>                        | 510.7  | 6184.8  | 439.6  |
|       | EBF | EB | Symplocaceae   | <i>Symplocos setchuensis</i>                     | 375.6  | 4594.6  | 309.2  |
|       | EBF | EB | Symplocaceae   | <i>Symplocos glauca</i>                          | 4176.2 | 35782.3 | 3529.4 |
|       | EBF | EB | Theaceae       | <i>Camellia japonica</i>                         | 425.2  | 4046.5  | 382.6  |
|       | EBF | EB | Theaceae       | <i>Cleyera japonica</i>                          | 1746.3 | 10371.3 | 1542   |
|       | EBF | EB | Theaceae       | <i>Schima sinensis</i>                           | 2812   | 29864.5 | 2411.7 |
|       | EBF | EB | Theaceae       | <i>Camellia tsaii</i> var. <i>synaptica</i>      | 129.3  | 2044.9  | 115.1  |
|       | EBF | EB | Theaceae       | <i>Eurya japonica</i>                            | 918    | 9126.6  | 785.4  |
|       | EBF | EB | Theaceae       | <i>Eurya kueichowensis</i>                       | 164.9  | 2709.5  | 137.5  |
|       | EBF | EB | Theaceae       | <i>Camellia pitardii</i>                         | 881.1  | 8137    | 722.1  |
| Luoji | EBF | EB | Caprifoliaceae | <i>Viburnum congestum</i>                        | 1459.8 | 6499.3  | 1267.4 |
|       | EBF | EB | Elaeocarpaceae | <i>Elaeocarpus duclouxii</i>                     | 1235.8 | 14273.7 | 1113.5 |
|       | EBF | EB | Ericaceae      | <i>Rhododendron nitidulum</i>                    | 123.1  | 1415    | 88.3   |
|       | EBF | EB | Ericaceae      | <i>Rhododendron rubiginosum</i>                  | 537.7  | 3466.6  | 451.2  |
|       | EBF | EB | Ericaceae      | <i>Rhododendron vernicosum</i>                   | 821.6  | 8769.6  | 697.9  |
|       | EBF | EB | Ericaceae      | <i>Vaccinium bracteatum</i>                      | 792.8  | 5789    | 721.7  |
|       | EBF | EB | Ericaceae      | <i>Vaccinium bracteatum</i> var. <i>chinense</i> | 198.8  | 2211.6  | 167.3  |
|       | EBF | EB | Ericaceae      | <i>Rhododendron strigillosum</i>                 | 1995.6 | 11689.1 | 1747.6 |
|       | EBF | EB | Fagaceae       | <i>Castanopsis delavayi</i>                      | 2593.5 | 15423.2 | 2270.5 |
|       | EBF | EB | Fagaceae       | <i>Castanea henryi</i>                           | 1423   | 8452.6  | 1280.1 |
|       | EBF | EB | Fagaceae       | <i>Castanopsis orthacantha</i>                   | 1179.7 | 8179.9  | 1011.1 |
|       | EBF | EB | Fagaceae       | <i>Quercus monimotricha</i>                      | 886    | 10174   | 832.5  |
|       | EBF | EB | Fagaceae       | <i>Lithocarpus cleistocarpus</i>                 | 4131.9 | 32568.1 | 3269.2 |
|       | EBF | EB | Fagaceae       | <i>Cyclobalanopsis glaucooides</i>               | 1181.5 | 7834.8  | 1043.7 |
|       | EBF | EB | Fagaceae       | <i>Quercus pannosa</i>                           | 2728.7 | 12554.6 | 2423.7 |
|       | EBF | EB | Fagaceae       | <i>Cyclobalanopsis delavayi</i>                  | 1380.8 | 10286.1 | 1175.9 |
|       | EBF | EB | Fagaceae       | <i>Quercus franchetii</i>                        | 1696.5 | 9521.2  | 1528.7 |
|       | EBF | EB | Lauraceae      | <i>Machilus yunnanensis</i>                      | 938.2  | 10127.4 | 836.9  |
|       | EBF | EB | Lauraceae      | <i>Lindera floribunda</i>                        | 917.1  | 5053.5  | 634.1  |

|        |     |    |                |                                                        |        |         |        |
|--------|-----|----|----------------|--------------------------------------------------------|--------|---------|--------|
|        | EBF | EB | Lauraceae      | <i>Neocinnamomum delavayi</i>                          | 1709.8 | 11090.9 | 1245   |
|        | EBF | EB | Lauraceae      | <i>Lindera communis</i>                                | 1888.9 | 13752.5 | 1433.3 |
|        | EBF | EB | Lauraceae      | <i>Cinnamomum glanduliferum</i>                        | 352.7  | 4982.1  | 328.3  |
|        | EBF | EB | Lauraceae      | <i>Phoebe faberi</i>                                   | 976.4  | 7035.8  | 844.5  |
|        | EBF | EB | Lauraceae      | <i>Phoebe forrestii</i>                                | 1077.7 | 13437.2 | 907.8  |
|        | EBF | EB | Magnoliaceae   | <i>Illicium micranthum</i>                             | 811.8  | 7234.6  | 718.4  |
|        | EBF | EB | Myricaceae     | <i>Myrica nana</i>                                     | 564.3  | 3845.4  | 461.8  |
|        | EBF | EB | Myricaceae     | <i>Myrica rubra</i>                                    | 598.4  | 4971.8  | 520.7  |
|        | EBF | EB | Oleaceae       | <i>Osmanthus fragrans</i>                              | 733.5  | 7296.6  | 628.2  |
|        | EBF | EB | Rosaceae       | <i>Photinia davidsoniae</i>                            | 1033.7 | 8808.9  | 905.2  |
|        | EBF | EB | Symplocaceae   | <i>Symplocos ernestii</i>                              | 839.4  | 7168.4  | 766.7  |
|        | EBF | EB | Symplocaceae   | <i>Symplocos grandis</i>                               | 565.9  | 5429.9  | 406.9  |
|        | EBF | EB | Symplocaceae   | <i>Symplocos setchuensis</i>                           | 495    | 4532.4  | 450    |
|        | EBF | EB | Theaceae       | <i>Camellia albo-sericea</i>                           | 282.3  | 4205    | 238.5  |
|        | EBF | EB | Theaceae       | <i>Eurya semiserrata</i>                               | 962.3  | 10938.6 | 842.6  |
|        | EBF | EB | Theaceae       | <i>Camellia henryana</i>                               | 634.9  | 5383.7  | 468.1  |
|        | EBF | EB | Theaceae       | <i>Ternstroemia gymnanthera</i>                        | 657.3  | 7225.1  | 574.8  |
|        | EBF | EB | Theaceae       | <i>Eurya japonica</i>                                  | 798.3  | 4966    | 557.3  |
|        | EBF | EB | Theaceae       | <i>camellia pitardii</i>                               | 802.2  | 7020.4  | 708.1  |
|        | EBF | EB | Theaceae       | <i>Schima argentea</i>                                 | 1860   | 14444.8 | 1732   |
| Pingwu | EBF | EB | Actinidiaceae  | <i>Actinidia chinensis</i>                             | 2361.8 | 33426.1 | 2191.5 |
|        | EBF | EB | Aquifoliaceae  | <i>Ilex szechwanensis</i>                              | 1410.5 | 13700.5 | 1252.7 |
|        | EBF | EB | Caprifoliaceae | <i>Viburnum oliganthum</i>                             | 171.2  | 2723.4  | 144    |
|        | EBF | EB | Celastraceae   | <i>Microtropis triflora</i>                            | 1249   | 16498.5 | 1105.5 |
|        | EBF | EB | Celastraceae   | <i>Euonymus hamiltonianus</i>                          | 717    | 13965.9 | 514    |
|        | EBF | EB | Cornaceae      | <i>Bothrocaryum controversum</i>                       | 1205.4 | 15478   | 1062.4 |
|        | EBF | EB | Cornaceae      | <i>Swida walteri</i>                                   | 1636.3 | 18880.4 | 1409.7 |
|        | EBF | EB | Cornaceae      | <i>Helwingia chinensis</i>                             | 444.3  | 6658.6  | 353.9  |
|        | EBF | EB | Elaeocarpaceae | <i>Elaeocarpus japonicus</i>                           | 2783.5 | 36523.5 | 2494.2 |
|        | EBF | EB | Elaeagnaceae   | <i>Elaeagnus magna</i>                                 | 1134.3 | 12458.4 | 1026.5 |
|        | EBF | EB | Ericaceae      | <i>Rhododendron argyrophyllum</i> var. <i>omeiense</i> | 998.9  | 9175.4  | 765.4  |
|        | EBF | EB | Ericaceae      | <i>Rhododendron amesiae</i>                            | 3408.6 | 17216.4 | 2201.4 |
|        | EBF | EB | Ericaceae      | <i>Rhododendron mucronatum</i>                         | 1567.8 | 7771.8  | 1115.3 |
|        | EBF | EB | Ericaceae      | <i>Rhododendron przewalskii</i>                        | 2148.4 | 10408.7 | 1214.6 |
|        | EBF | EB | Ericaceae      | <i>Rhododendron lacteum</i>                            | 2053.1 | 28736.2 | 1878.1 |
|        | EBF | EB | Fagaceae       | <i>Quercus engleriana</i>                              | 2608   | 18872.9 | 2199.3 |
|        | EBF | EB | Fagaceae       | <i>Cyclobalanopsis multiervis</i>                      | 7137.3 | 49312.8 | 6363.8 |
|        | EBF | EB | Fagaceae       | <i>Castanopsis platycantha</i>                         | 931.5  | 10451.2 | 777.3  |
|        | EBF | EB | Fagaceae       | <i>Lindera megaphylla</i>                              | 1642.8 | 13030.8 | 1363.2 |
|        | EBF | EB | Fagaceae       | <i>Castanopsis fargesii</i>                            | 957    | 6661.6  | 810.3  |
|        | EBF | EB | Fagaceae       | <i>Fagus lucida</i>                                    | 832.4  | 15532   | 727.8  |
|        | EBF | EB | Fagaceae       | <i>Castanea henryi</i> var. <i>omeiensis</i>           | 629.4  | 5908.1  | 525.8  |
|        | EBF | EB | Fagaceae       | <i>Castanopsis eyrei</i>                               | 698.3  | 7043.7  | 577.4  |
|        | EBF | EB | Fagaceae       | <i>Cyclobalanopsis multiervis</i>                      | 4292.5 | 26658.7 | 3330.6 |
|        | EBF | EB | Fagaceae       | <i>Cyclobalanopsis glauca</i>                          | 1717.4 | 10904   | 1359.4 |
|        | EBF | EB | Fagaceae       | <i>Cyclobalanopsis myrsinifolia</i>                    | 3418.8 | 21335.9 | 2567.3 |
|        | EBF | EB | Lauraceae      | <i>Litsea mollis</i>                                   | 3034.7 | 26627.3 | 2695.7 |
|        | EBF | EB | Lauraceae      | <i>Phoebe neuranthoides</i>                            | 1569.2 | 12282   | 1279.6 |
|        | EBF | EB | Lauraceae      | <i>Lindera limprichtii</i>                             | 2989.6 | 23333.4 | 2443.3 |
|        | EBF | EB | Lauraceae      | <i>Cinnamomum japonicum</i>                            | 1726.8 | 14877.4 | 1547.6 |
|        | EBF | EB | Lauraceae      | <i>Lindera aggregata</i>                               | 1337.7 | 12062.7 | 1123.6 |
|        | EBF | EB | Lauraceae      | <i>Lindera communis</i>                                | 1100.9 | 18143.7 | 1006.4 |
|        | EBF | EB | Lauraceae      | <i>Machilus microcarpa</i>                             | 806.8  | 8065.1  | 590.2  |

|        |     |    |                |                                                         |         |         |         |
|--------|-----|----|----------------|---------------------------------------------------------|---------|---------|---------|
|        | EBF | EB | Lauraceae      | <i>Litsea populifolia</i>                               | 2414    | 34963.6 | 2163.3  |
|        | EBF | EB | Lauraceae      | <i>Machilus ichangensis</i>                             | 2748    | 21381.1 | 2318.7  |
|        | EBF | EB | Lauraceae      | <i>Cinnamomum longepaniculatum</i>                      | 5608.3  | 36792.4 | 4250.1  |
|        | EBF | EB | Lauraceae      | <i>Phoebe fabri</i>                                     | 406.1   | 3990.6  | 359.1   |
|        | EBF | EB | Lauraceae      | <i>Litsea lancifolia</i>                                | 982.9   | 10124.7 | 870.3   |
|        | EBF | EB | Lauraceae      | <i>Lindera communis</i>                                 | 1269.4  | 17521.3 | 1094    |
|        | EBF | EB | Magnoliaceae   | <i>Michelia wilsonii</i>                                | 1300    | 12325.5 | 969.2   |
|        | EBF | EB | Rhamnaceae     | <i>Rhamnus hemsleyana</i>                               | 2593.3  | 33402.2 | 1853.3  |
|        | EBF | EB | Rosaceae       | <i>Cotoneaster dammerii</i>                             | 443.3   | 5253.9  | 362.3   |
|        | EBF | EB | Salicaceae     | <i>Salix ernesti</i>                                    | 419.9   | 5129    | 329.8   |
|        | EBF | EB | Saxifragaceae  | <i>Dichroa febrifuga</i>                                | 1823.5  | 25805.3 | 1643.1  |
|        | EBF | EB | Stachyuraceae  | <i>Stachyurus chinensis</i>                             | 668     | 9216.2  | 597.8   |
|        | EBF | EB | Stachyuraceae  | <i>Stachyurus chinensis</i>                             | 1170    | 13962.3 | 853     |
|        | EBF | EB | Symplocaceae   | <i>Symplocos botryantha</i>                             | 762.4   | 8219.6  | 584.4   |
|        | EBF | EB | Symplocaceae   | <i>Symplocos setchuensis</i>                            | 6053.6  | 44204.8 | 5530.4  |
|        | EBF | EB | Theaceae       | <i>Camellia sinensis</i>                                | 415.5   | 5725.5  | 359.9   |
|        | EBF | EB | Theaceae       | <i>Schima wallichii</i>                                 | 1763.7  | 14311.4 | 1512    |
|        | EBF | EB | Theaceae       | <i>Ternstroemia gymnanthera</i>                         | 2109    | 17870.5 | 1814.5  |
|        | EBF | EB | Theaceae       | <i>Camellia pitardii</i>                                | 2147.4  | 13696.6 | 1628.8  |
|        | EBF | EB | Viburnaceae    | <i>Viburnum erosum</i>                                  | 1574.8  | 9361.5  | 1329.2  |
|        | EBF | EB | Viburnaceae    | <i>Viburnum cinnamomifolium</i>                         | 2189.1  | 18100.5 | 1890.3  |
| Gongga | EBF | EB | Aquifoliaceae  | <i>Ilex pernyi</i>                                      | 311.4   | 2613.7  | 268.2   |
|        | EBF | EB | Aquifoliaceae  | <i>Ilex macrocarpa</i>                                  | 414.4   | 10633.5 | 326.3   |
|        | EBF | EB | Aquifoliaceae  | <i>Ilex chinensis</i>                                   | 211.6   | 2182.9  | 178     |
|        | EBF | EB | Berberidaceae  | <i>Berberis ferdinandi-coburgii</i>                     | 162     | 2945.1  | 147.3   |
|        | EBF | EB | Caprifoliaceae | <i>Viburnum hanceanum</i>                               | 301.1   | 7700.9  | 276     |
|        | EBF | EB | Caprifoliaceae | <i>Viburnum congestum</i>                               | 594.6   | 6467.2  | 469.1   |
|        | EBF | EB | Caprifoliaceae | <i>Viburnum cinnamomifolium</i>                         | 1107.1  | 11188.2 | 1020.1  |
|        | EBF | EB | Caprifoliaceae | <i>Viburnum rhytidophyllum</i>                          | 806.5   | 10077.9 | 629.8   |
|        | EBF | EB | Ericaceae      | <i>Rhododendron tubiforme</i>                           | 1495.2  | 13209.3 | 1394.2  |
|        | EBF | EB | Ericaceae      | <i>Rhododendron sphaeroblastum</i>                      | 15560.2 | 99618.7 | 14152.3 |
|        | EBF | EB | Ericaceae      | <i>Rhododendron yunnanense</i>                          | 876.3   | 9247    | 760.9   |
|        | EBF | EB | Ericaceae      | <i>Rhododendron concinuum</i>                           | 1947    | 19208.9 | 1852.5  |
|        | EBF | EB | Ericaceae      | <i>Rhododendron argyrophyllum</i>                       | 6052.2  | 45621.3 | 5490.7  |
|        | EBF | EB | Ericaceae      | <i>Rhododendron oreotrephes</i>                         | 213.7   | 2796.3  | 167.7   |
|        | EBF | EB | Ericaceae      | <i>Rhododendron coeloneurum</i>                         | 1865.5  | 12430.1 | 1479.8  |
|        | EBF | EB | Ericaceae      | <i>Vaccinium iteophyllum</i> var.<br><i>glandulosum</i> | 778.4   | 8375.6  | 691.5   |
|        | EBF | EB | Fagaceae       | <i>Quercus engleriana</i>                               | 1657.7  | 10909.8 | 1385.9  |
|        | EBF | EB | Fagaceae       | <i>Lithocarpus cleistocarpus</i>                        | 6049.7  | 37558.3 | 5265.3  |
|        | EBF | EB | Fagaceae       | <i>Cyclobalanopsis oxydon</i>                           | 2344.9  | 18459.6 | 2071.5  |
|        | EBF | EB | Fagaceae       | <i>Cyclobalanopsis myrsinifolia</i>                     | 525.9   | 6622    | 486.5   |
|        | EBF | EB | Lauraceae      | <i>Phoebe zhennan</i>                                   | 1808.8  | 21706.3 | 1535.3  |
|        | EBF | EB | Lauraceae      | <i>Machilus pingii</i>                                  | 1603    | 16477.3 | 1379.3  |
|        | EBF | EB | Lauraceae      | <i>Neolitsea aurata</i>                                 | 1007.8  | 11248.7 | 770.2   |
|        | EBF | EB | Lauraceae      | <i>Litsea populifolia</i>                               | 1162.5  | 14508   | 1029.5  |
|        | EBF | EB | Lauraceae      | <i>Phoebe fabri</i>                                     | 828.6   | 7862.1  | 672.7   |
|        | EBF | EB | Lauraceae      | <i>Phoebe microphylla</i>                               | 459.1   | 3850.8  | 423.8   |
|        | EBF | EB | Magnoliaceae   | <i>Magnolia dawsoniana</i>                              | 714.3   | 14701.9 | 633     |
|        | EBF | EB | Moraceae       | <i>Morus australis</i>                                  | 2043.7  | 32520.5 | 1362.5  |
|        | EBF | EB | Rosaceae       | <i>Stranvaesia davidiana</i>                            | 104.3   | 1289.1  | 94      |
|        | EBF | EB | Rosaceae       | <i>Photinia serrulata</i>                               | 2270    | 12276.5 | 1630.3  |
|        | EBF | EB | Rutaceae       | <i>Skimmia reevesiana</i>                               | 1026.1  | 10795.4 | 839.6   |
|        | EBF | EB | Thymelaeaceae  | <i>Daphne odora</i>                                     | 637.4   | 10319   | 556     |

|     |    |                   |                                                          |        |          |        |
|-----|----|-------------------|----------------------------------------------------------|--------|----------|--------|
| EBF | DB | Aceraceae         | <i>Acer ginnala</i>                                      | 479.7  | 6939.5   | 428.4  |
| EBF | DB | Aceraceae         | <i>Acer oliverianum</i>                                  | 322.3  | 7051.5   | 302.5  |
| EBF | DB | Aceraceae         | <i>Acer sinense</i>                                      | 179    | 5231.8   | 168    |
| EBF | DB | Aceraceae         | <i>Acer longipes</i>                                     | 807.2  | 17588.9  | 752.6  |
| EBF | DB | Aceraceae         | <i>Acer davidii</i>                                      | 764.4  | 9621.5   | 715.5  |
| EBF | DB | Aceraceae         | <i>Acer laxiflorum</i>                                   | 1328.9 | 35132.9  | 1241.6 |
| EBF | DB | Alangiaceae       | <i>Alangium chinense</i>                                 | 1119.2 | 25098.2  | 976    |
| EBF | DB | Betulaceae        | <i>Carpinus turczaninowii</i>                            | 483    | 7996.6   | 422.6  |
| EBF | DB | Betulaceae        | <i>Ostrya japonica</i>                                   | 199.8  | 5080.9   | 163.1  |
| EBF | DB | Betulaceae        | <i>Betula insignis</i>                                   | 250.1  | 3755.4   | 235.2  |
| EBF | DB | Betulaceae        | <i>Corylus ferox</i>                                     | 3200.3 | 29211    | 2772.9 |
| EBF | DB | Betulaceae        | <i>Alnus cremastogyne</i>                                | 2151.7 | 26511.4  | 1815.8 |
| EBF | DB | Caprifoliaceae    | <i>Viburnum dilatatum</i>                                | 401.7  | 5048.8   | 322.3  |
| EBF | DB | Caprifoliaceae    | <i>Viburnum betulifolium</i>                             | 358.9  | 5068.2   | 305.4  |
| EBF | DB | Cercidiphyllaceae | <i>Cercidiphyllum japonicum</i>                          | 832.7  | 10309    | 624.5  |
| EBF | DB | Cornaceae         | <i>Helwingia japonica</i>                                | 382.4  | 8442.4   | 326.4  |
| EBF | DB | Cornaceae         | <i>Bothrocaryum controversum</i>                         | 1727.4 | 21775.7  | 1547.8 |
| EBF | DB | Cornaceae         | <i>Dendrobenthamia japonica</i> var.<br><i>chinensis</i> | 1372.6 | 10995.3  | 1314.3 |
| EBF | DB | Cornaceae         | <i>Swida macrophylla</i>                                 | 1618.2 | 20939.6  | 1355.1 |
| EBF | DB | Elaeagnaceae      | <i>Elaeagnus angustifolia</i>                            | 682.4  | 7550.9   | 548.3  |
| EBF | DB | Elaeagnaceae      | <i>Elaeagnus angustata</i>                               | 183.2  | 3949.6   | 151.4  |
| EBF | DB | Ericaceae         | <i>Gaultheria trichoclada</i>                            | 1015.3 | 7272.5   | 817.7  |
| EBF | DB | Eupteleaceae      | <i>Euptelea pleiospermum</i>                             | 966.8  | 19012.8  | 824.3  |
| EBF | DB | Hamamelidaceae    | <i>Corylopsis willmottiae</i>                            | 1365.5 | 20747.3  | 1128.3 |
| EBF | DB | Hamamelidaceae    | <i>Corylopsis sinensis</i>                               | 652.3  | 8814     | 556.9  |
| EBF | DB | Lauraceae         | <i>Litsea cubeba</i>                                     | 809.5  | 15639.3  | 693.7  |
| EBF | DB | Lauraceae         | <i>Lindera obtusiloba</i>                                | 993.2  | 19697.2  | 761.4  |
| EBF | DB | Magnoliaceae      | <i>Tetracentron sinense</i>                              | 930.6  | 15775.9  | 672.6  |
| EBF | DB | Polygalaceae      | <i>Polygala arillata</i> var. <i>ovata</i>               | 286.7  | 6806.8   | 184.7  |
| EBF | DB | Portulacaceae     | <i>Coriaria nepalensis</i>                               | 755.7  | 8754.5   | 591.7  |
| EBF | DB | Rhamnaceae        | <i>Rhamnella franguloides</i>                            | 1275.3 | 19273.3  | 1088.3 |
| EBF | DB | Rhamnaceae        | <i>Rhamnus parvifolia</i>                                | 301.5  | 5645.6   | 211.8  |
| EBF | DB | Rosaceae          | <i>Neillia thrysiiflora</i>                              | 415.1  | 7956.5   | 320.7  |
| EBF | DB | Rosaceae          | <i>Maddenia hypoleuca</i>                                | 172.4  | 5386.4   | 151    |
| EBF | DB | Rosaceae          | <i>Malus spectabilis</i>                                 | 2458.5 | 22022.6  | 1801   |
| EBF | DB | Rosaceae          | <i>Sorbus hemsleyi</i>                                   | 309    | 5748.3   | 277.8  |
| EBF | DB | Rosaceae          | <i>Cerasus pseudocerasus</i>                             | 131    | 4879.5   | 112.8  |
| EBF | DB | Rosaceae          | <i>Cotoneaster bullatus</i>                              | 336.6  | 6409.1   | 291.8  |
| EBF | DB | Rosaceae          | <i>Padus racemosa</i>                                    | 1563   | 20807.2  | 1114.9 |
| EBF | DB | Sabiaceae         | <i>Meliosma cuneifolia</i>                               | 1073.1 | 12056.4  | 851.6  |
| EBF | DB | Sabiaceae         | <i>Meliosma myriantha</i>                                | 521.4  | 10166.8  | 475.3  |
| EBF | DB | Salicaceae        | <i>Salix moupinensis</i>                                 | 809.3  | 7818.9   | 690    |
| EBF | DB | Salicaceae        | <i>Salix pseudowolohoensis</i>                           | 1071.3 | 11245.1  | 905.9  |
| EBF | DB | Salicaceae        | <i>Salix phanera</i>                                     | 1155.8 | 13154.7  | 883.7  |
| EBF | DB | Salicaceae        | <i>Populus purdomii</i>                                  | 9842.4 | 133728.6 | 8526.1 |
| EBF | DB | Saxifragaceae     | <i>Hydrangea macrophylla</i> var.<br><i>macrophylla</i>  | 310.3  | 11844.4  | 219    |
| EBF | DB | Saxifragaceae     | <i>Ribes glaciale</i>                                    | 2472   | 31240    | 1841.7 |
| EBF | DB | Saxifragaceae     | <i>Deutzia longifolia</i>                                | 259.3  | 5466.6   | 192.3  |
| EBF | DB | Saxifragaceae     | <i>Ribes fargesii</i>                                    | 57.5   | 1239     | 48     |
| EBF | DB | Saxifragaceae     | <i>Ribes tenue</i>                                       | 99.7   | 3340.7   | 86     |
| EBF | DB | Saxifragaceae     | <i>Ribes moupinense</i>                                  | 1249.3 | 20365.3  | 927.3  |
| EBF | DB | Saxifragaceae     | <i>Hydrangea strigosa</i>                                | 1348.3 | 30078.3  | 1091.6 |

|         |     |                |                             |                                  |         |         |        |
|---------|-----|----------------|-----------------------------|----------------------------------|---------|---------|--------|
| Ggongga | EBF | DB             | Saxifragaceae               | <i>Deutzia yunnanensis</i>       | 94.8    | 2519.7  | 75.7   |
|         | EBF | DB             | Saxifragaceae               | <i>Hydrangea xanthoneura</i>     | 1324    | 17953.2 | 1255.7 |
|         | MF  | DB             | Stachyuraceae               | <i>Stachyurus chinensis</i>      | 1030.7  | 13847   | 816    |
|         | MF  | DB             | Styracaceae                 | <i>Pterostyrax psilophyllus</i>  | 1891    | 30630.6 | 1744.5 |
|         | MF  | DB             | Ulmaceae                    | <i>Ulmus bergmanniana</i>        | 1213.6  | 16511.5 | 1055.9 |
|         | MF  | DB             | Saxifragaceae               | <i>Ribes fargesii</i>            | 50.7    | 1602.9  | 46.8   |
|         | MF  | DB             | Caprifoliaceae              | <i>Viburnum dilatatum</i>        | 466.9   | 6914.4  | 422.7  |
|         | MF  | DB             | Saxifragaceae               | <i>Philadelphus dasycalyx</i>    | 3131.7  | 33117.3 | 2416.7 |
|         | MF  | DB             | Ericaceae                   | <i>Enkianthus deflexus</i>       | 182.7   | 2074.3  | 130.0  |
|         | MF  | DB             | Cornaceae                   | <i>Helwingia japonica</i>        | 1023.2  | 25675.0 | 818.9  |
|         | MF  | DB             | Saxifragaceae               | <i>Philadelphus incanus</i>      | 338.0   | 7912.9  | 280.0  |
|         | MF  | DB             | Caprifoliaceae              | <i>Lonicera tangutica</i>        | 175.7   | 2181.5  | 151.7  |
|         | MF  | DB             | Celastraceae                | <i>Euonymus alatus</i>           | 144.0   | 3441.4  | 124.4  |
|         | MF  | DB             | Salicaceae                  | <i>Salix cathayana</i>           | 349.6   | 6696.3  | 294.3  |
|         | MF  | DB             | Rosaceae                    | <i>Maddenia hypoleuca</i>        | 458.0   | 8363.1  | 392.3  |
|         | MF  | DB             | Rosaceae                    | <i>Sorbus multijuga</i>          | 332.3   | 7763.9  | 273.0  |
|         | MF  | DB             | Sabiaceae                   | <i>Meliosma cuneifolia</i>       | 802.2   | 17495.9 | 692.1  |
|         | MF  | DB             | Salicaceae                  | <i>Salix luctuosa</i>            | 462.1   | 4157.7  | 412.6  |
|         | MF  | DB             | Rosaceae                    | <i>Cerasus dielsiana</i>         | 656.4   | 10240.9 | 605.4  |
|         | MF  | DB             | Lauraceae                   | <i>Litsea cubeba</i>             | 98.7    | 2233.6  | 85.0   |
|         | MF  | DB             | Rosaceae                    | <i>Padus racemosa</i>            | 887.7   | 10891.1 | 696.1  |
|         | MF  | DB             | Cornaceae                   | <i>Bothrocaryum controversum</i> | 679.2   | 8152.2  | 626.8  |
|         | MF  | DB             | Salicaceae                  | <i>Populus purdomii</i>          | 6618.3  | 56134.3 | 5887.7 |
|         | MF  | DB             | Rosaceae                    | <i>Cerasus glabra</i>            | 451.0   | 8964.6  | 411.7  |
|         | MF  | DB             | Rosaceae                    | <i>Sorbus palleescens</i>        | 1127.0  | 13126.7 | 994.3  |
|         | MF  | DB             | Eupteleaceae                | <i>Rhamnus hemsleyana</i>        | 2149.0  | 28277.1 | 1821.0 |
|         | MF  | DB             | Eupteleaceae                | <i>Euptelea pleiosperma</i>      | 990.9   | 20482.9 | 851.0  |
|         | MF  | DB             | Aceraceae                   | <i>Acer davidii</i>              | 821.4   | 8900.4  | 731.7  |
| MF      | DB  | Flacourtiaceae | <i>Carrierea calycina</i>   | 1989.3                           | 27462.9 | 1618.7  |        |
| MF      | DB  | Aceraceae      | <i>Acer flabellatum</i>     | 1009.2                           | 12698.1 | 922.5   |        |
| MF      | DB  | Aceraceae      | <i>Acer laxiflorum</i>      | 1026.8                           | 19310.6 | 950.7   |        |
| MF      | DB  | Magndiaceae    | <i>Tetracentron sinense</i> | 918.6                            | 11534.2 | 691.7   |        |
| MF      | DB  | Aceraceae      | <i>Acer oliverianum</i>     | 365.7                            | 9059.3  | 336.7   |        |
| MF      | DB  | Rosaceae       | <i>Pyrus pashia</i>         | 1651.5                           | 15929.4 | 1451.6  |        |
